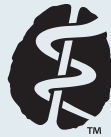

# Psychiatric Services

A Journal of the American Psychiatric Association

*Psychiatric Services*, established in 1950, is published monthly by the American Psychiatric Association for mental health professionals and others concerned with treatment and services for persons with mental illnesses and mental disabilities, in keeping with APA's objectives to improve care and treatment, to promote research and professional education in psychiatric and related fields, and to advance the standards of all psychiatric services and facilities.

## Editor

Lisa B. Dixon, M.D., M.P.H.

## Editorial Board

Steven Adelsheim, M.D.  
Regina Bussing, M.D., M.S.H.S.  
Marcela Horvitz-Lennon, M.D., M.P.H.  
Sheryl H. Kataoka, M.D.  
Roberto Lewis-Fernández, M.D.  
Hunter L. McQuiston, M.D.  
Ramin Mojtabai, M.D., Ph.D.  
Mark R. Munetz, M.D.  
David W. Oslin, M.D.  
Ruth Shim, M.D., M.P.H.  
Gregory E. Simon, M.D., M.P.H.  
T. Scott Stroup, M.D., M.P.H.

## Contributing Editors

*Case Studies in Public-Sector Leadership*  
Jules M. Ranz, M.D., Susan M. Deakins, M.D., and Stephanie Le Melle, M.D.  
*Culture & Mental Health Services*  
Roberto Lewis-Fernández, M.D.  
*Datapoints*  
Amy M. Kilbourne, Ph.D., M.P.H., and Tami L. Mark, Ph.D.  
*Economic Grand Rounds*  
Steven S. Sharfstein, M.D., Haiden A. Huskamp, Ph.D., and Alison Evans Cuellar, Ph.D.  
*Frontline Reports*  
Francine Cournos, M.D., and Stephen M. Goldfinger, M.D.  
*Global Mental Health Reforms*  
Kathleen M. Pike, M.D., and Pamela Scorza, Sc.D., M.P.H.  
*Integrated Care*  
Benjamin G. Druss, M.D., M.P.H., and Gail L. Daumit, M.D., M.H.S.  
*Law & Psychiatry*  
Paul S. Appelbaum, M.D.  
*Personal Accounts*  
Jeffrey L. Geller, M.D., M.P.H., and Frederick J. Frese, Ph.D.  
*Promoting High-Value Mental Health Care*  
Marcela Horvitz-Lennon, M.D., M.P.H., and Kenneth Minkoff, M.D.  
*From Pages to Practice* podcast  
Josh Berezin, M.D., M.S.  
*Research, Community, & Services Partnerships*  
Debra A. Pinals, M.D., and Marcia Valenstein, M.D., M.S.

## State Mental Health Policy

Fred C. Osher, M.D., and Marvin S. Swartz, M.D.

## Technology in Mental Health

Dror Ben-Zeev, Ph.D.

## Editors Emeriti

Howard H. Goldman, M.D., Ph.D.  
John A. Talbott, M.D.

## Statistical Consultant

Deborah R. Medoff, Ph.D.

## Editorial Consultants

Joseph M. Cerimele, M.D.  
Julie M. Donohue, Ph.D.  
Robert E. Drake, M.D., Ph.D.  
Laura Van Tosh

## Editorial Staff

Demarie S. Jackson  
*Managing Editor*  
Kathleen Stearman  
*Senior Editor/Writer*  
Wendy Lieberman Taylor  
*Production Manager*  
Heidi A. Koch  
*Editorial Support Services Manager*

## Interim Publisher

John McDuffie

## Editorial Director, Journals

Michael D. Roy

## American Psychiatric Association

Anita S. Everett, M.D., *President*  
Altha Stewart, M.D., *President-Elect*  
Daniel J. Anzia, M.D., *Speaker, APA Assembly*  
Saul Levin, M.D., M.P.A., *Chief Executive Officer and Medical Director*

## Mailing Address

*Psychiatric Services*  
American Psychiatric Association  
800 Maine Ave., S.W., Suite 900  
Washington, DC 20024

## Editorial Office

Email: [psjournal@psych.org](mailto:psjournal@psych.org)
