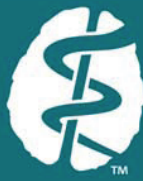

## From Concept to Publication:

### A Hands-on Workshop With *Psychiatric Services* Editors

Wednesday, May 9, 2018 • 8:00–9:30 a.m. • Javits Center 1A19/20, First Level

Would you like to get published but are not sure how to do so? Whether you have formal research training or work in a clinical setting, writing for professional journals can increase your professional impact and be personally fulfilling. Yet navigating the publications process, from submission through peer review and production, may seem daunting. This hands-on workshop will decode the process. Bring your ideas and, if possible, a 750-word draft. Presenters will work with a sample paper and walk the group through a typical peer-review process.

- Learn what to expect in peer review and how to interpret and respond to decision letters.
- Find out how to adapt and present your ideas for different formats.
- Break into small groups for specific critiques and guidance.
- Discuss publication ideas with a *PS* board member or column editor and outline steps to prepare material for publication.

Meet the *PS* Editor, Lisa B. Dixon, M.D., M.P.H., and her *PS* colleagues: Francine Cournos, M.D., Stephen M. Goldfinger, M.D., Roberto Lewis-Fernandez, M.D., Debra A. Pinals, M.D., Steven S. Sharfstein, M.D.

## Management of Adults With Traumatic Brain Injury

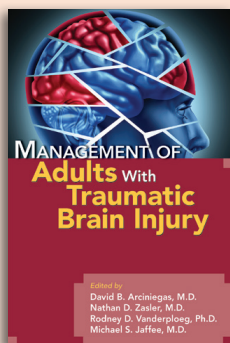

Edited by David B. Arciniegas, M.D., Nathan D. Zasler, M.D., Rodney D. Vanderploeg, Ph.D., and Michael S. Jaffee, M.D.

Traumatic brain injury (TBI) is a public health issue of worldwide proportions, affecting motorists, victims of interpersonal violence, athletes, military service members, and Veterans, among others. ***Management of Adults with Traumatic Brain Injury*** provides evidence-informed guidance on the core topics in brain injury medicine, including the epidemiology and pathophysiology of TBI, the medical evaluation and neuropsychological assessment of persons with TBI, and the common cognitive, emotional, behavioral, and other neurological disturbances for which persons with TBI and their families seek clinical care.

This book is a must-read for every physician, nurse, and mental health practitioner working to improve the lives of persons with TBI.

2013 • 587 pages • ISBN 978-1-58562-404-1 • Paperback • \$87.00 • Item #62404

2013 • 587 pages • ISBN 978-1-58562-988-6 • eBook • \$70.00 • Item #62988

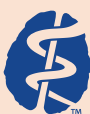

Source: http://ps.psychiatryonline.org/doi/suppl/10.1176/ps.2018.69.issue-4/suppl_file/front.pdf
