# Psychiatric Services

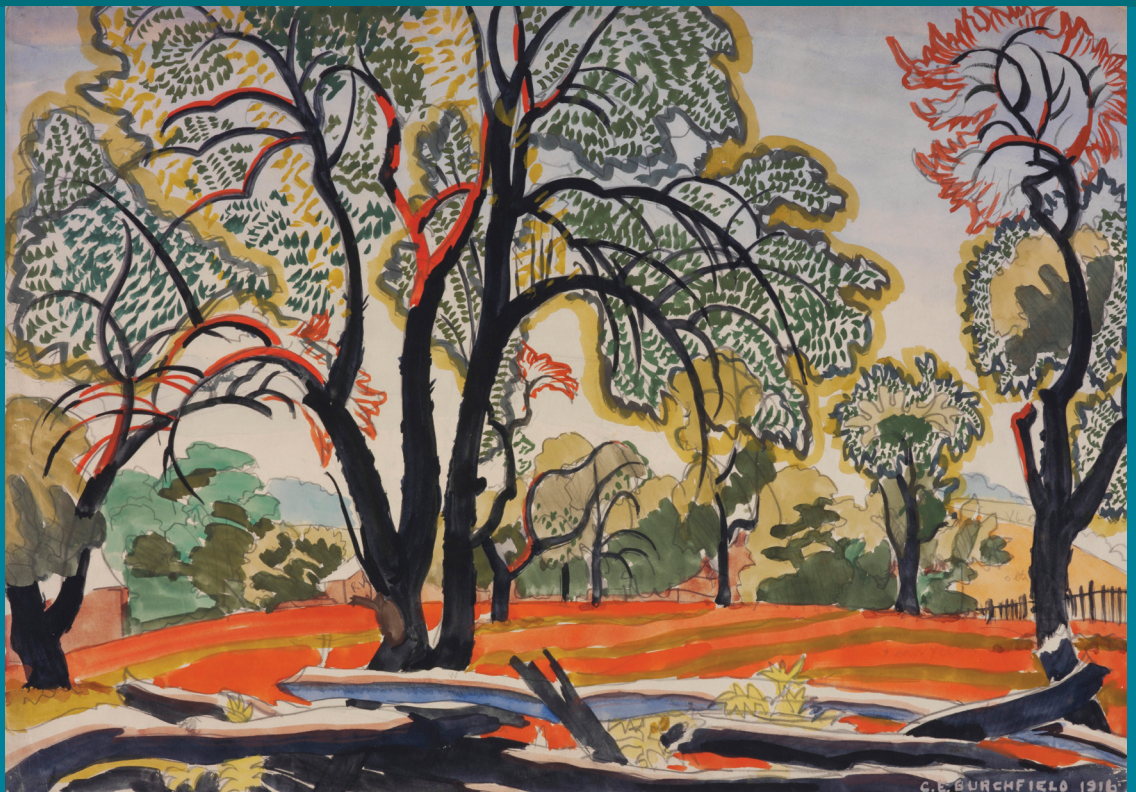

Incorporating peer-to-peer interactions in 5 digital interventions for psychotic disorders

Trends in youths' antidepressant use since 2004 FDA warning

Federal parity and access to behavioral health care in commercial health plans

PC-MHI in the VA: shifting mental health services to primary care
