# Understanding Mental Disorders

Your Guide to DSM-5®

American Psychiatric Association

A consumer guide for anyone who has  
been touched by mental illness!

With Foreword by Patrick J. Kennedy

Most of us know someone who suffers from a mental illness. This book helps those who may be struggling with mental health problems, as well as those who want to help others achieve mental health and well-being.

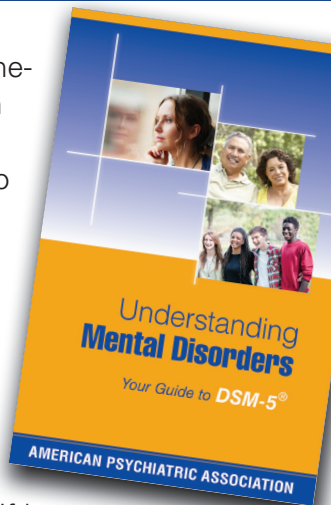

Based on the latest, fifth edition of the *Diagnostic and Statistical Manual of Mental Disorders*—known as DSM-5®—**Understanding Mental Disorders** provides valuable insight on what to expect from an illness and its treatment—and will help readers recognize symptoms, know when to seek help, and get the right care. Featured disorders include depression, schizophrenia, ADHD, autism spectrum disorder, posttraumatic stress disorder, and bipolar disorder, among others.

2015 • 388 pages • ISBN 978-1-58562-491-1  
Paperback • \$24.95 • Item #62491

AMERICAN  
PSYCHIATRIC  
ASSOCIATION  
PUBLISHING

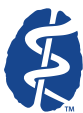

[www.appi.org](http://www.appi.org)

Phone: 703-907-7322

Toll Free: 1-800-368-5777

Email: [appi@psych.org](mailto:appi@psych.org)

20% Discount • American Psychiatric Association Members  
25% Discount • APA Resident-Fellow Members

AH1718

# Our Work Matters

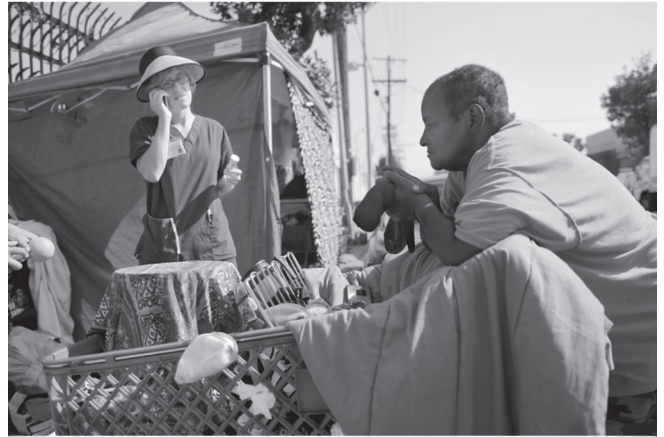

Join us and make a difference for  
those who need it the most.

Los Angeles County Department of Mental Health is a nationally recognized leader providing a wide range of services to one of the largest populations in the country. We invite you to join our team as we help the most vulnerable in our community find a path to independence and personal recovery.

Competitive salary **starting at \$233,784/yr** with **benefits/potential bonuses** up to \$30,000/yr and **24hrs/wk** for outside employment.

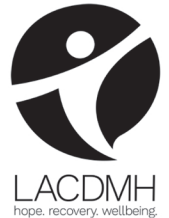

[www.psychiatristjobs.la](http://www.psychiatristjobs.la)

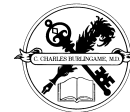

We are pleased to announce that  
**KENNETH S. KENDLER, M.D.**  
is the 2018 recipient of the  
**C. CHARLES BURLINGAME, M.D. AWARD**  
for his outstanding contributions to psychiatry.

#### Past Recipients

1988 Robert Kellner, M.D., Ph.D.  
1989 William T. Carpenter, Jr., M.D.  
1990 Dennis P. Cantwell, M.D.  
1991 George E. Vaillant, M.D.  
1992 A. John Rush, M.D.  
1993 John C. Nemiah, M.D.  
1994 Maurice J. Martin, M.D.  
1995 Otto F. Kernberg, M.D.  
1996 Charles P. O'Brien, M.D., Ph.D.  
1997 Glen Owen Gabbard, M.D.  
1998 Lissy F. Jarvik, M.D., Ph.D.  
1999 Nancy C. Andreasen, M.D., Ph.D.  
2000 Lewis L. Judd, M.D.  
2001 Paul S. Appelbaum, M.D.  
2002 Charles B. Nemeroff, M.D., Ph.D.  
2003 Dilip V. Jeste, M.D.  
2004 David H. Barlow, Ph.D.  
2005 Herbert D. Kleber, M.D.  
2006 Daniel N. Stern, M.D.  
2007 Jerrold F. Rosenbaum, M.D.  
2008 K. Ranga Rama Krishnan, M.D.  
2009 David J. Kupfer, M.D.  
2010 Professor Sir Michael Rutter  
2011 Jeffrey A. Lieberman, M.D.  
2012 Judith L. Rapoport, M.D.  
2013 Nora D. Volkow, M.D.  
2014 Daniel R. Weinberger, M.D.  
2015 David A. Brent, M.D.  
2016 Steven S. Sharfstein, M.D.  
2017 Harold Alan Pincus, M.D.

Institute  
of Living

A Division of Hartford Hospital

200 Retreat Avenue  
Hartford, CT 06106  
1-800-673-2411

**JUST PUBLISHED!**

# Telepsychiatry and Health Technologies

## A Guide for Mental Health Professionals

*Peter Yellowlees, MBBS, M.D., and Jay H. Shore, M.D., M.P.H.*

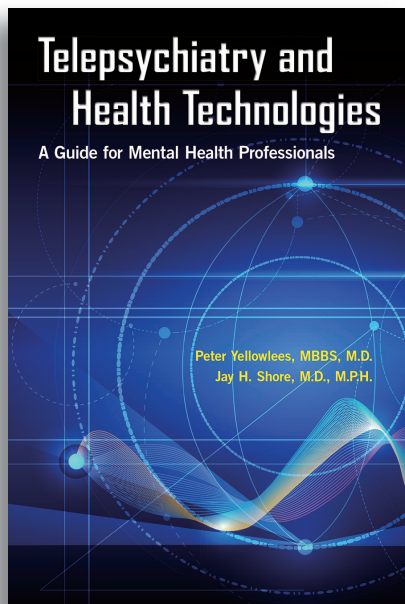

*Telepsychiatry and Health Technologies: A Guide for Mental Health Professionals* is a practical guide for psychiatrists and other mental health professionals seeking to exploit the enormous potential of today's innovative digital technologies to improve the quality, accessibility, and cost-effectiveness of care for patients with psychiatric disorders. Taking the doctor-patient relationship as its consistent focus, the book explores currently available mental health care delivery technologies—from telephony, smartphones, and apps to e-mail, secure texting, and videoconferencing—and offers practical advice to clinicians on how best to make use of these tools to provide high-quality care to their patients. Beginning with an overview of current psychiatric practice, the authors cover the broader context of telepsychiatry, including its history and evidence base; give specific guidance on setting up

and managing a telepsychiatry practice; and discuss in-person, online, and hybrid models of care, as well as data collection, electronic records, clinical documentation, and ethics.

Foremost a clinical manual, *Telepsychiatry and Health Technologies: A Guide for Mental Health Professionals* argues that the sensible use of health care technologies will reduce the current gap between mental health care supply and demand, improve models of care delivery, and ultimately lead to better health for more patients than traditional systems of care can provide.

2018 • 403 pages • ISBN 978-1-61537-085-6 • Paperback • \$69.00 • Item #37085

2018 • 403 pages • ISBN 978-1-61537-160-0 • eBook • \$55.00 • Item #37160

AMERICAN  
PSYCHIATRIC  
ASSOCIATION  
PUBLISHING

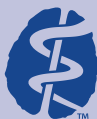

Order online @ [www.appi.org](http://www.appi.org)  
or Call Toll Free: 1-800-368-5777  
Email: [appi@psych.org](mailto:appi@psych.org)

20% Discount for American Psychiatric Association Members

25% Discount for APA Resident-Fellow Members

Priority Code AH1806A

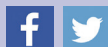

Source: https://psychiatryonline.org/doi/suppl/10.1176/ps.2018.69.issue-4/suppl_file/back.pdf
